# Supplementary material for: Comparison of four functionalization methods of gold nanoparticles for enhancing the enzyme-linked immunosorbent assay (ELISA)
Source: publisher site journal article supplement (doi:10.3762/bjnano.8.27), 2017-01-25
Supplement: Additional file 1 [file 2190-4286-8-27-S1.pdf]

Supporting Information  
for

**Comparison of four functionalization methods of  
gold nanoparticles for enhancing the  
enzyme-linked immunosorbent assay (ELISA)**

Paula Ciaurriz<sup>1</sup>, Fátima Fernández<sup>1</sup>, Edurne Tellechea<sup>1</sup>, Jose F. Moran<sup>2</sup> and  
Aaron C. Asensio\*<sup>1</sup>

Address: <sup>1</sup>Cemitec (Multidisciplinary Center of Technologies for Industry),  
Polígono Mocholí, Plaza Cein 3, Noain 31110, Spain and

<sup>2</sup>IdAB-CSIC-UPNA-GN (Institute of Agro-Biotechnology), Public University of  
Navarre, Campus Arrosadía s/n, Pamplona 31006, Spain

Email: Aaron C. Asensio - [acabrera@cemitec.com](mailto:acabrera@cemitec.com)

\*Corresponding author

**Additional Figure**

**A**

|                                | Size (d.nm):         | % Intensity: | St Dev (d.nm): |
|--------------------------------|----------------------|--------------|----------------|
| <b>Z-Average (d.nm):</b> 21.58 | <b>Peak 1:</b> 20.99 | 98.8         | 5.486          |
| <b>PdI:</b> 0.249              | <b>Peak 2:</b> 5445  | 1.2          | 272.0          |
| <b>Intercept:</b> 0.942        | <b>Peak 3:</b> 0.000 | 0.0          | 0.000          |

**Result quality : Good**

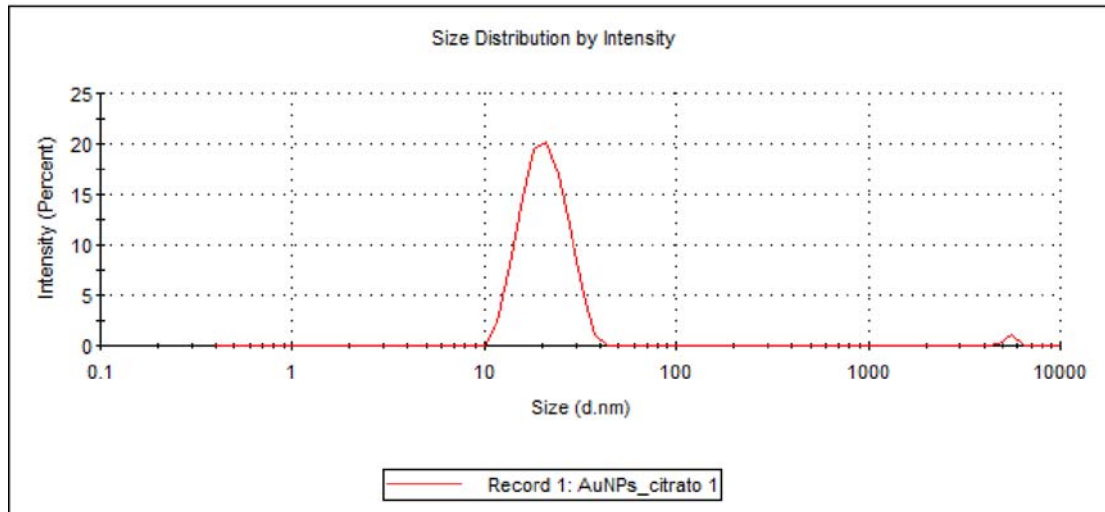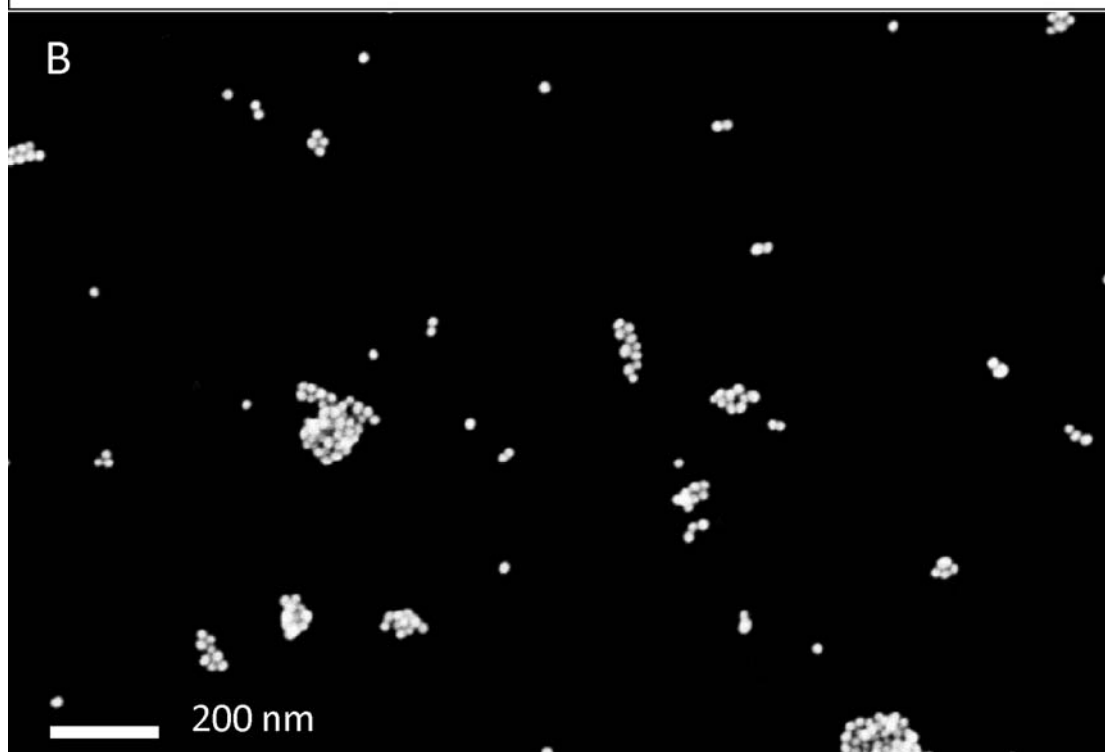

**Figure S1:** Characterization of nanoparticle synthesis by using DLS (A) and SEM (B). The resulting AuNPs have a spherical shape and a diameter of approximately 20 nm.
